# Supplementary material
Source: publisher site journal article supplement (https://www.dovepress.com/article/104074)
Supplement: Supplementary file 1 [file get_supplementary_file.php]

# Supplemental materials

Figure S1. ABRs for BAY 81-8973 administered two times weekly versus rAHF-PFM (Valentino)

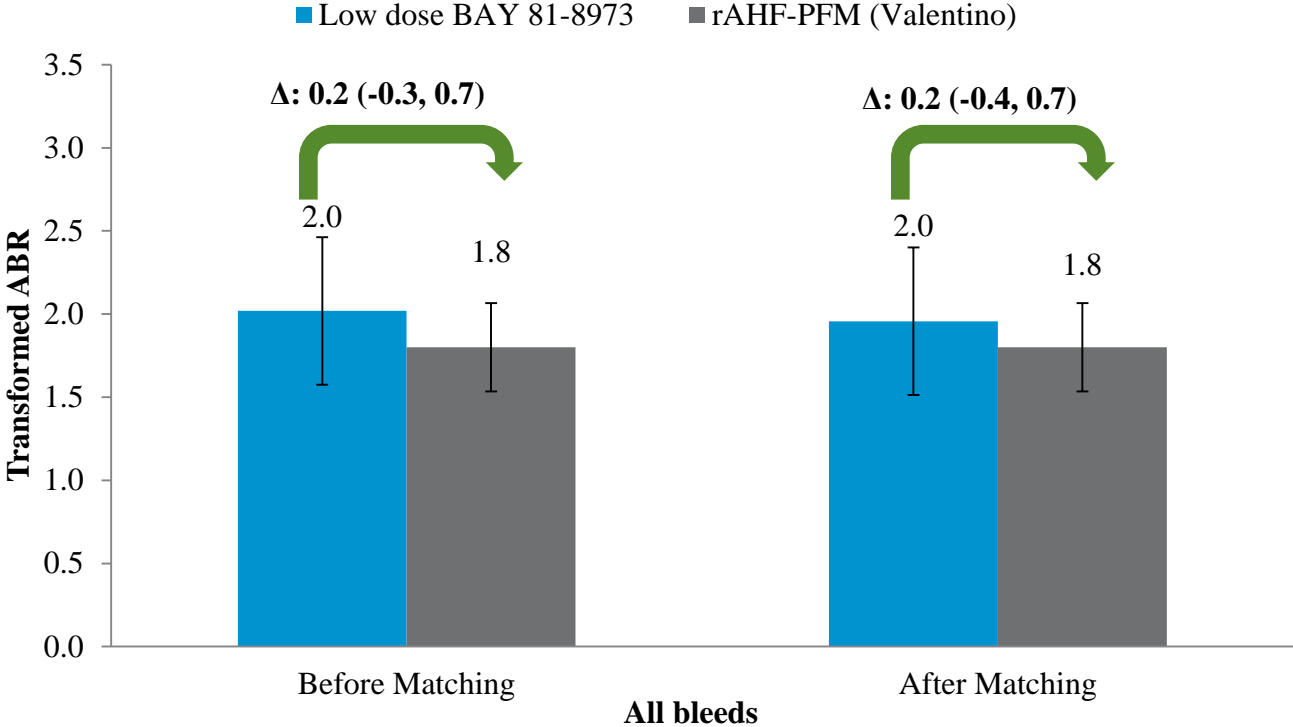

Figure S2. ABRs for BAY 81-8973 administered two times weekly versus rAHF-PFM (Tarantino)

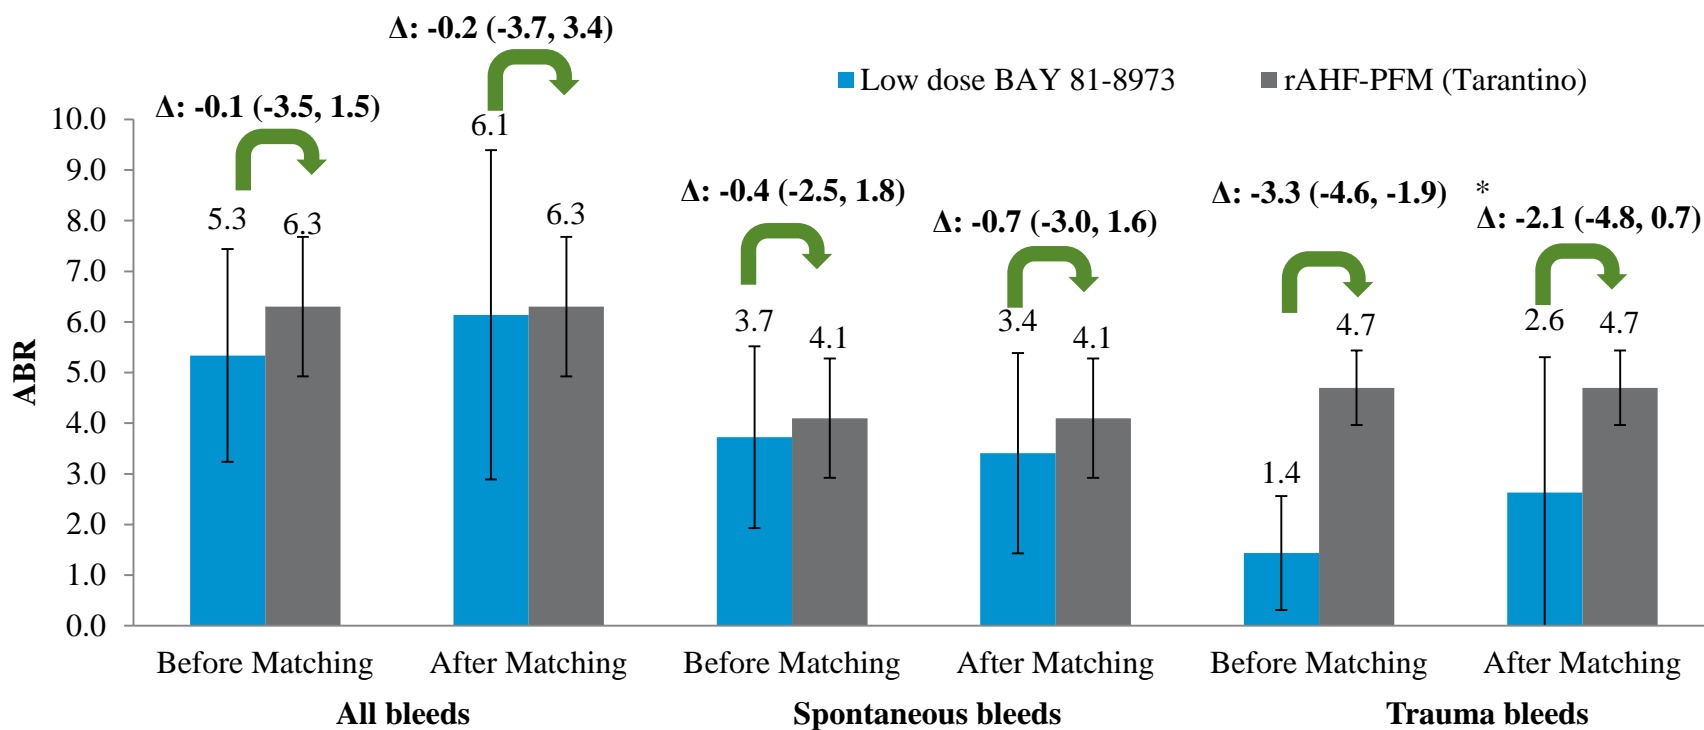

Figure S3. ABRs for BAY 81-8973 administered two times weekly versus turoctocog alfa

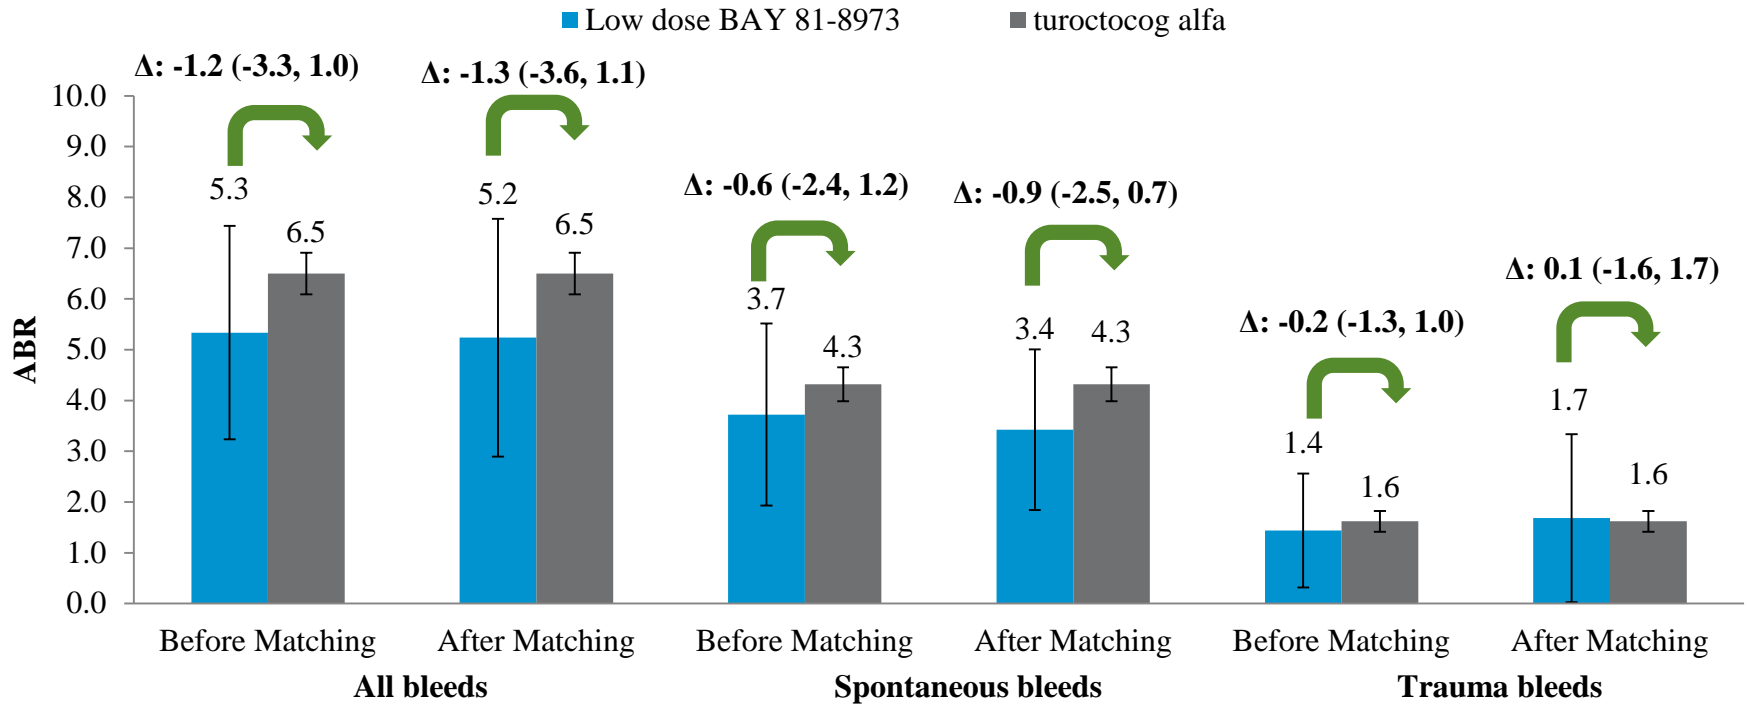

**Table S1. Inclusion and exclusion criteria for screening**

| Inclusion Criteria                                                                                                   | Exclusion Criteria                                                                                                                                                                                                          |
|----------------------------------------------------------------------------------------------------------------------|-----------------------------------------------------------------------------------------------------------------------------------------------------------------------------------------------------------------------------|
| <b>Language</b>                                                                                                      |                                                                                                                                                                                                                             |
| <ul style="list-style-type: none"> <li>• Studies in English</li> </ul>                                               | <ul style="list-style-type: none"> <li>• Studies not in English</li> </ul>                                                                                                                                                  |
| <b>Study design and publication type</b>                                                                             |                                                                                                                                                                                                                             |
| <ul style="list-style-type: none"> <li>• Randomized controlled trials (RCTs)</li> <li>• Single-arm trials</li> </ul> | <ul style="list-style-type: none"> <li>• Reviews (SLR and narrative reviews)*</li> <li>• Observational studies</li> <li>• Case reports</li> <li>• Commentaries and letters</li> <li>• Recommendations/guidelines</li> </ul> |
| <b>Study population</b>                                                                                              |                                                                                                                                                                                                                             |
| <ul style="list-style-type: none"> <li>• Adult and adolescent patient with severe hemophilia A</li> </ul>            | <ul style="list-style-type: none"> <li>• Non-human studies</li> <li>• Studies focusing on pediatric patients</li> <li>• Not hemophilia A</li> <li>• Not severe hemophilia A patients**</li> </ul>                           |
| <b>Study interventions</b>                                                                                           |                                                                                                                                                                                                                             |
| <ul style="list-style-type: none"> <li>• rAHF-PFM</li> <li>• turoctocog alfa</li> </ul>                              | <ul style="list-style-type: none"> <li>• Studies that do not include rAHF-PFM or turoctocog alfa</li> </ul>                                                                                                                 |

**Notes:**

\* Reviews were flagged and excluded. References were checked for potential articles.

\*\* Studies with mixed severe and moderately severe hemophilia A patients may be included.

**Table S2. Outcomes for BAY 81-8973 administered two times weekly (first six-month) versus rAHF-PFM (Tarantino)**

|                              | Before matching |       |           |       |            | After matching |       |           |       |            |
|------------------------------|-----------------|-------|-----------|-------|------------|----------------|-------|-----------|-------|------------|
|                              | BAY 81-8973     |       | rAHF-PFM  |       | Difference | BAY 81-8973    |       | rAHF-PFM  |       | Difference |
|                              | (N = 46)        |       | (N = 107) |       |            | (N = 46)       |       | (N = 107) |       |            |
|                              | [A]             |       | [B]       |       | [A - B]    | [C]            |       | [D]       |       | [C - D]    |
| Patients with zero bleeds, % | 33%             |       | 30%       |       | 3%         | 33%            |       | 30%       |       | 3%         |
| ABR, mean (SD)               |                 |       |           |       |            |                |       |           |       |            |
| All bleeds                   | 6.8             | (8.7) | 6.3       | (8.7) | 0.5        | 7.3            | (9.4) | 6.3       | (8.7) | 1.0        |
| Spontaneous bleeds           | 4.9             | (8.2) | 4.1       | (8.2) | 0.8        | 4.3            | (7.6) | 4.1       | (8.2) | 0.2        |
| Trauma bleeds                | 1.5             | (4.3) | 4.7       | (4.3) | -3.2*      | 2.8            | (6.5) | 4.7       | (4.3) | -1.9       |

**Table S3. Outcomes for BAY 81-8973 administered two times weekly (first six-month) versus turoctocog alfa**

|                              | Before matching |       |                 |       |            | After matching |       |                 |       |            |
|------------------------------|-----------------|-------|-----------------|-------|------------|----------------|-------|-----------------|-------|------------|
|                              | BAY 81-8973     |       | turoctocog alfa |       | Difference | BAY 81-8973    |       | turoctocog alfa |       | Difference |
|                              | (N = 46)        |       | (N = 150)       |       |            | (N = 46)       |       | (N = 150)       |       |            |
|                              | [A]             |       | [B]             |       | [A - B]    | [C]            |       | [D]             |       | [C - D]    |
| Patients with zero bleeds, % | 33%             |       | 30%             |       | 3%         | 28%            |       | 30%             |       | -2%        |
| ABR, mean (SD)               |                 |       |                 |       |            |                |       |                 |       |            |
| All bleeds                   | 6.8             | (8.7) | 6.5             | (2.5) | 0.3        | 6.5            | (8.3) | 6.5             | (2.5) | 0.0        |
| Spontaneous bleeds           | 4.9             | (8.2) | 4.3             | (2.1) | 0.6        | 4.5            | (7.1) | 4.3             | (2.1) | 0.2        |
| Trauma bleeds                | 1.5             | (4.3) | 1.6             | (1.3) | -0.1       | 1.8            | (5.1) | 1.6             | (1.3) | 0.2        |

**Table S4. Outcomes for BAY 81-8973 in LEOPOLD II versus rAHF-PFM (Valentino)**

|                              | Before matching |       |          |       |            | After matching |       |          |       |            |
|------------------------------|-----------------|-------|----------|-------|------------|----------------|-------|----------|-------|------------|
|                              | BAY 81-8973     |       | rAHF-PFM |       | Difference | BAY 81-8973    |       | rAHF-PFM |       | Difference |
|                              | (N = 59)        |       | (N = 66) |       |            | (N = 59)       |       | (N = 66) |       |            |
|                              | [A]             |       | [B]      |       | [A - B]    | [C]            |       | [D]      |       | [C - D]    |
| Patients with zero bleeds, % | 27%             |       | 33%      |       | -6%        | 27%            |       | 33%      |       | -6%        |
| Transformed ABR, mean (SD)   |                 |       |          |       |            |                |       |          |       |            |
| All bleeds                   | 2.0             | (1.3) | 1.8      | (1.1) | 0.2        | 2.0            | (1.3) | 1.8      | (1.1) | 0.2        |

**Table S5. Outcomes for BAY 81-8973 in LEOPOLD II versus rAHF-PFM (Tarantino)**

|                              | Before matching |       |           |       |            | After matching |       |           |       |            |
|------------------------------|-----------------|-------|-----------|-------|------------|----------------|-------|-----------|-------|------------|
|                              | BAY 81-8973     |       | rAHF-PFM  |       | Difference | BAY 81-8973    |       | rAHF-PFM  |       | Difference |
|                              | (N = 59)        |       | (N = 107) |       |            | (N = 59)       |       | (N = 107) |       |            |
|                              | [A]             | [B]   | [A - B]   | [C]   | [D]        | [C - D]        |       |           |       |            |
| Patients with zero bleeds, % | 27%             |       | 30%       |       | -3%        | 28%            |       | 30%       |       | -2%        |
| ABR, mean (SD)               |                 |       |           |       |            |                |       |           |       |            |
| All bleeds                   | 4.9             | (6.8) | 6.3       | (6.8) | -1.4       | 5.0            | (6.9) | 6.3       | (6.8) | -1.3       |
| Spontaneous bleeds           | 3.5             | (6.0) | 4.1       | (6.0) | -0.6       | 3.5            | (6.0) | 4.1       | (6.0) | -0.6       |
| Trauma bleeds                | 1.3             | (2.3) | 4.7       | (2.3) | -3.4*      | 1.5            | (2.4) | 4.7       | (2.3) | -3.2*      |



**Table S6. Outcomes for BAY 81-8973 in LEOPOLD II versus turoctocog alfa**

|                              | Before matching |       |                 |       |            | After matching |       |                 |       |            |
|------------------------------|-----------------|-------|-----------------|-------|------------|----------------|-------|-----------------|-------|------------|
|                              | BAY 81-8973     |       | turoctocog alfa |       | Difference | BAY 81-8973    |       | turoctocog alfa |       | Difference |
|                              | (N = 59)        |       | (N = 150)       |       |            | (N = 59)       |       | (N = 150)       |       |            |
|                              | [A]             |       | [B]             |       | [A - B]    | [C]            |       | [D]             |       | [C - D]    |
| Patients with zero bleeds, % | 27%             |       | 30%             |       | -3%        | 26%            |       | 30%             |       | -4%        |
| ABR, mean (SD)               |                 |       |                 |       |            |                |       |                 |       |            |
| All bleeds                   | 4.9             | (6.8) | 6.5             | (2.5) | -1.6       | 4.3            | (6.6) | 6.5             | (2.5) | -2.2       |
| Spontaneous bleeds           | 3.5             | (6.0) | 4.3             | (2.1) | -0.8       | 3.1            | (6.0) | 4.3             | (2.1) | -1.2       |
| Trauma bleeds                | 1.3             | (2.3) | 1.6             | (1.3) | -0.4       | 1.1            | (2.1) | 1.6             | (1.3) | -0.6       |

**Table S7. Outcomes for BAY 81-8973 (first six-month) in LEOPOLD II versus rAHF-PFM (Tarantino)**

|                              | Before matching |       |           |       |            | After matching |       |           |       |            |
|------------------------------|-----------------|-------|-----------|-------|------------|----------------|-------|-----------|-------|------------|
|                              | BAY 81-8973     |       | rAHF-PFM  |       | Difference | BAY 81-8973    |       | rAHF-PFM  |       | Difference |
|                              | (N = 28)        |       | (N = 107) |       |            | (N = 28)       |       | (N = 107) |       |            |
|                              | [A]             | [B]   | [A - B]   | [C]   | [D]        | [C - D]        |       |           |       |            |
| Patients with zero bleeds, % | 32%             | 30%   | 2%        | 39%   | 30%        | 9%             |       |           |       |            |
| ABR, mean (SD)               |                 |       |           |       |            |                |       |           |       |            |
| All bleeds                   | 6.0             | (8.3) | 6.3       | (8.3) | -0.3       | 6.1            | (8.5) | 6.3       | (8.3) | -0.2       |
| Spontaneous bleeds           | 4.3             | (7.6) | 4.1       | (7.6) | 0.2        | 4.2            | (7.6) | 4.1       | (7.6) | 0.1        |
| Trauma bleeds                | 1.4             | (3.3) | 4.7       | (3.3) | -3.3*      | 1.8            | (3.5) | 4.7       | (3.3) | -2.9*      |

**Table S8. Outcomes for BAY 81-8973 (first six-month) in LEOPOLD II versus turoctocog alfa**

|                              | Before matching |       |                 |       |            | After matching |       |                 |       |            |
|------------------------------|-----------------|-------|-----------------|-------|------------|----------------|-------|-----------------|-------|------------|
|                              | BAY 81-8973     |       | turoctocog alfa |       | Difference | BAY 81-8973    |       | turoctocog alfa |       | Difference |
|                              | (N = 59)        |       | (N = 150)       |       |            | (N = 59)       |       | (N = 150)       |       |            |
|                              | [A]             |       | [B]             |       | [A - B]    | [C]            |       | [D]             |       | [C - D]    |
| Patients with zero bleeds, % | 32%             |       | 30%             |       | 2%         | 31%            |       | 30%             |       | 1%         |
| ABR, mean (SD)               |                 |       |                 |       |            |                |       |                 |       |            |
| All bleeds                   | 6.0             | (8.3) | 6.5             | (2.5) | -0.5       | 5.3            | (8.0) | 6.5             | (2.5) | -1.2       |
| Spontaneous bleeds           | 4.3             | (7.6) | 4.3             | (2.1) | -0.1       | 3.9            | (7.4) | 4.3             | (2.1) | -0.4       |
| Trauma bleeds                | 1.4             | (3.3) | 1.6             | (1.3) | -0.2       | 1.2            | (2.8) | 1.6             | (1.3) | -0.5       |

**Table S9. Outcomes for BAY 81-8973 administered two times weekly in LEOPOLD II versus rAHF-PFM (Valentino)**

|                              | Before matching |       |          |       |            | After matching |       |          |       |            |
|------------------------------|-----------------|-------|----------|-------|------------|----------------|-------|----------|-------|------------|
|                              | BAY 81-8973     |       | rAHF-PFM |       | Difference | BAY 81-8973    |       | rAHF-PFM |       | Difference |
|                              | (N = 28)        |       | (N = 66) |       |            | (N = 28)       |       | (N = 66) |       |            |
|                              | [A]             | [B]   | [A - B]  | [C]   | [D]        | [C - D]        |       |          |       |            |
| Patients with zero bleeds, % | 29%             |       | 33%      |       | -5%        | 37%            |       | 33%      |       | 4%         |
| Transformed ABR, mean (SD)   |                 |       |          |       |            |                |       |          |       |            |
| All bleeds                   | 2.1             | (1.3) | 1.8      | (1.1) | 0.3        | 2.0            | (1.4) | 1.8      | (1.1) | 0.2        |

**Table S10. Outcomes for BAY 81-8973 administered two times weekly in LEOPOLD II versus rAHF-PFM (Tarantino)**

|                              | Before matching |       |           |       |            | After matching |       |           |       |            |
|------------------------------|-----------------|-------|-----------|-------|------------|----------------|-------|-----------|-------|------------|
|                              | BAY 81-8973     |       | rAHF-PFM  |       | Difference | BAY 81-8973    |       | rAHF-PFM  |       | Difference |
|                              | (N = 28)        |       | (N = 107) |       |            | (N = 28)       |       | (N = 107) |       |            |
|                              | [A]             | [B]   | [A - B]   | [C]   | [D]        | [C - D]        |       |           |       |            |
| Patients with zero bleeds, % | 29%             | 30%   | -1%       | 40%   | 30%        | 10%            |       |           |       |            |
| ABR, mean (SD)               |                 |       |           |       |            |                |       |           |       |            |
| All bleeds                   | 5.7             | (7.2) | 6.3       | (7.2) | -0.6       | 5.7            | (7.7) | 6.3       | (7.2) | -0.6       |
| Spontaneous bleeds           | 4.5             | (7.1) | 4.1       | (7.1) | 0.4        | 4.6            | (7.5) | 4.1       | (7.1) | 0.5        |
| Trauma bleeds                | 0.9             | (1.5) | 4.7       | (1.5) | -3.8*      | 1.0            | (1.6) | 4.7       | (1.5) | -3.7*      |

**Table S11. Outcomes for BAY 81-8973 administered two times weekly in LEOPOLD II versus turoctocog alfa**

|                              | Before matching |       |                 |       |            | After matching |       |                 |       |            |
|------------------------------|-----------------|-------|-----------------|-------|------------|----------------|-------|-----------------|-------|------------|
|                              | BAY 81-8973     |       | turoctocog alfa |       | Difference | BAY 81-8973    |       | turoctocog alfa |       | Difference |
|                              | (N = 28)        |       | (N = 150)       |       |            | (N = 28)       |       | (N = 150)       |       |            |
|                              | [A]             | [B]   | [A - B]         | [C]   | [D]        | [C - D]        |       |                 |       |            |
| Patients with zero bleeds, % | 29%             | 30%   | -1%             | 33%   | 30%        | 3%             |       |                 |       |            |
| ABR, mean (SD)               |                 |       |                 |       |            |                |       |                 |       |            |
| All bleeds                   | 5.7             | (7.2) | 6.5             | (2.5) | -0.8       | 4.5            | (6.6) | 6.5             | (2.5) | -2.0       |
| Spontaneous bleeds           | 4.5             | (7.1) | 4.3             | (2.1) | 0.2        | 3.4            | (6.3) | 4.3             | (2.1) | -0.9       |
| Trauma bleeds                | 0.9             | (1.5) | 1.6             | (1.3) | -0.7*      | 0.9            | (1.7) | 1.6             | (1.3) | -0.7       |

**Table S12. Outcomes for BAY 81-8973 administered two times weekly (first six-month) in LEOPOLD II versus rAHF-PFM (Tarantino)**

|                              | Before matching |       |           |       |            | After matching |       |           |       |            |
|------------------------------|-----------------|-------|-----------|-------|------------|----------------|-------|-----------|-------|------------|
|                              | BAY 81-8973     |       | rAHF-PFM  |       | Difference | BAY 81-8973    |       | rAHF-PFM  |       | Difference |
|                              | (N = 28)        |       | (N = 107) |       |            | (N = 28)       |       | (N = 107) |       |            |
|                              | [A]             | [B]   | [A - B]   | [C]   | [D]        | [C - D]        |       |           |       |            |
| Patients with zero bleeds, % | 29%             | 30%   | -1%       | 40%   | 30%        | 10%            |       |           |       |            |
| ABR, mean (SD)               |                 |       |           |       |            |                |       |           |       |            |
| All bleeds                   | 7.6             | (9.1) | 6.3       | (9.1) | 1.3        | 7.6            | (9.6) | 6.3       | (9.1) | 1.3        |
| Spontaneous bleeds           | 6.2             | (9.3) | 4.1       | (9.3) | 2.1        | 6.2            | (9.5) | 4.1       | (9.3) | 2.1        |
| Trauma bleeds                | 1.0             | (1.7) | 4.7       | (1.7) | -3.7*      | 1.2            | (1.7) | 4.7       | (1.7) | -3.5*      |

**Table S13. Outcomes for BAY 81-8973 administered two times weekly (first six-month) in LEOPOLD II versus turoctocog alfa**

|                              | Before matching |       |                 |       |            | After matching |       |                 |       |            |
|------------------------------|-----------------|-------|-----------------|-------|------------|----------------|-------|-----------------|-------|------------|
|                              | BAY 81-8973     |       | turoctocog alfa |       | Difference | BAY 81-8973    |       | turoctocog alfa |       | Difference |
|                              | (N = 28)        |       | (N = 150)       |       |            | (N = 28)       |       | (N = 150)       |       |            |
|                              | [A]             |       | [B]             |       | [A - B]    | [C]            |       | [D]             |       | [C - D]    |
| Patients with zero bleeds, % | 29%             |       | 30%             |       | -1%        | 33%            |       | 30%             |       | 3%         |
| ABR, mean (SD)               |                 |       |                 |       |            |                |       |                 |       |            |
| All bleeds                   | 7.6             | (9.1) | 6.5             | (2.5) | 1.1        | 6.0            | (8.3) | 6.5             | (2.5) | -0.5       |
| Spontaneous bleeds           | 6.2             | (9.3) | 4.3             | (2.1) | 1.9        | 4.8            | (8.1) | 4.3             | (2.1) | 0.5        |
| Trauma bleeds                | 1.0             | (1.7) | 1.6             | (1.3) | -0.6       | 1.0            | (1.8) | 1.6             | (1.3) | -0.6       |
